# Supplementary material
Source: PubMed Central journal article supplement (PMC3265876)
Supplement: supp_M111.287813_jbc.M111.287813-1.pdf [file supp_M111.287813_jbc.M111.287813-1.pdf]

**Table S1 Data collection and refinement statistics**

| Data set                                         | Y194F- $\Delta$ 270    | D159S/Y194F- $\Delta$ 270 |
|--------------------------------------------------|------------------------|---------------------------|
| Space group                                      | I222                   | I222                      |
| a (Å)                                            | 58.28                  | 56.53                     |
| b (Å)                                            | 103.37                 | 105.64                    |
| c (Å)                                            | 119.63                 | 120.08                    |
| Resolution Range (Å)                             | 25.77-2.10 (2.21-2.10) | 25.72-2.40 (2.53-2.40)    |
| Observed reflections                             | 85,692                 | 56,698                    |
| Independent reflections                          | 21,489                 | 14,436                    |
| Rmerge (%) <sup>a</sup>                          | 6.8 (29.5)             | 6.9 (39.7)                |
| I/ $\sigma$                                      | 8.8 (2.6)              | 8.6 (1.9)                 |
| Completeness (%)                                 | 99.9 (99.9)            | 99.9 (100.0)              |
| Refinement                                       |                        |                           |
| Reflections in refinement                        | 20,342                 | 13,710                    |
| R <sub>cryst.</sub> (%) <sup>b</sup>             | 19.62                  | 21.28                     |
| R <sub>free</sub> (%) (test set 5%) <sup>c</sup> | 23.94                  | 25.92                     |
| r.m.s.d. on bond lengths (Å) <sup>d</sup>        | 0.009                  | 0.011                     |
| r.m.s.d. on bond angles (°) <sup>d</sup>         | 1.178                  | 1.307                     |

The values in parentheses refer to the highest resolution shells.

<sup>a</sup>  $R_{\text{merge}} = \sum_h \sum_i |I_{ih} - \langle I_h \rangle| / \sum_h \sum_i \langle I_h \rangle$  where  $\langle I_h \rangle$  is the mean intensity of the  $i$  observations of reflection  $h$ .

<sup>b</sup>  $R_{\text{cryst}} = \sum | |F_{\text{obs}}| - |F_{\text{calc}}| | / \sum |F_{\text{obs}}|$ , where  $|F_{\text{obs}}|$  and  $|F_{\text{calc}}|$  are the observed and calculated structure factor amplitudes, respectively. Summation includes all reflections used in the refinement.

<sup>c</sup>  $R_{\text{free}} = \sum | |F_{\text{obs}}| - |F_{\text{calc}}| | / \sum |F_{\text{obs}}|$ , evaluated for a randomly chosen subset of 5% of the diffraction data not included in the refinement.

<sup>d</sup> Root mean square deviation from ideal values.
